# Supplementary material for: Circadian rhythmicity persists through the Polar night and midnight sun in Svalbard reindeer
Source: PubMed Central journal article supplement (PMC6160466; doi:10.1038/s41598-018-32778-4), 2018-09-27
Supplement: 41598_2018_32778_MOESM1_ESM.pdf [file 41598_2018_32778_MOESM1_ESM.pdf]

# **Circadian rhythmicity persists through the Polar night and midnight sun in Svalbard reindeer+**

Walter Arnold <sup>1\*</sup>, Thomas Ruf <sup>1</sup>, Leif Egil Loe <sup>2</sup>, R. Justin Irvine <sup>3</sup>, Erik Ropstad <sup>4</sup>, Vebjørn Veiberg <sup>5</sup> and Steve D. Albon <sup>3</sup>

<sup>1</sup> University of Veterinary Medicine, Vienna, Department of Integrative Biology and Evolution, Research Institute of Wildlife Ecology, Austria

<sup>2</sup> Norwegian University of Life Sciences, Department of Ecology and Natural Resource Management, Norway

<sup>3</sup> The James Hutton Institute, Craigiebuckler, Aberdeen, Scotland, United Kingdom

<sup>4</sup> Norwegian University of Life Sciences, Faculty of Veterinary Medicine, Oslo, Norway

<sup>5</sup> Norwegian Institute for Nature Research (NINA), Trondheim, Norway

\*Corresponding Author:

Walter Arnold

University of Veterinary Medicine, Vienna, Department of Integrative Biology and Evolution, Research Institute of Wildlife Ecology  
Savoyenstr. 1, 1160 Vienna, Austria

E-mail: [walter.arnold@vetmeduni.ac.at](mailto:walter.arnold@vetmeduni.ac.at)

Phone: +43-1-25077-7100

Fax: +43-1-25077-94-7100

+Dedication in memoriam Prof. Dr. Serge Daan (1940-2018), one of the greatest thinkers in Chronobiology

### Head position changes

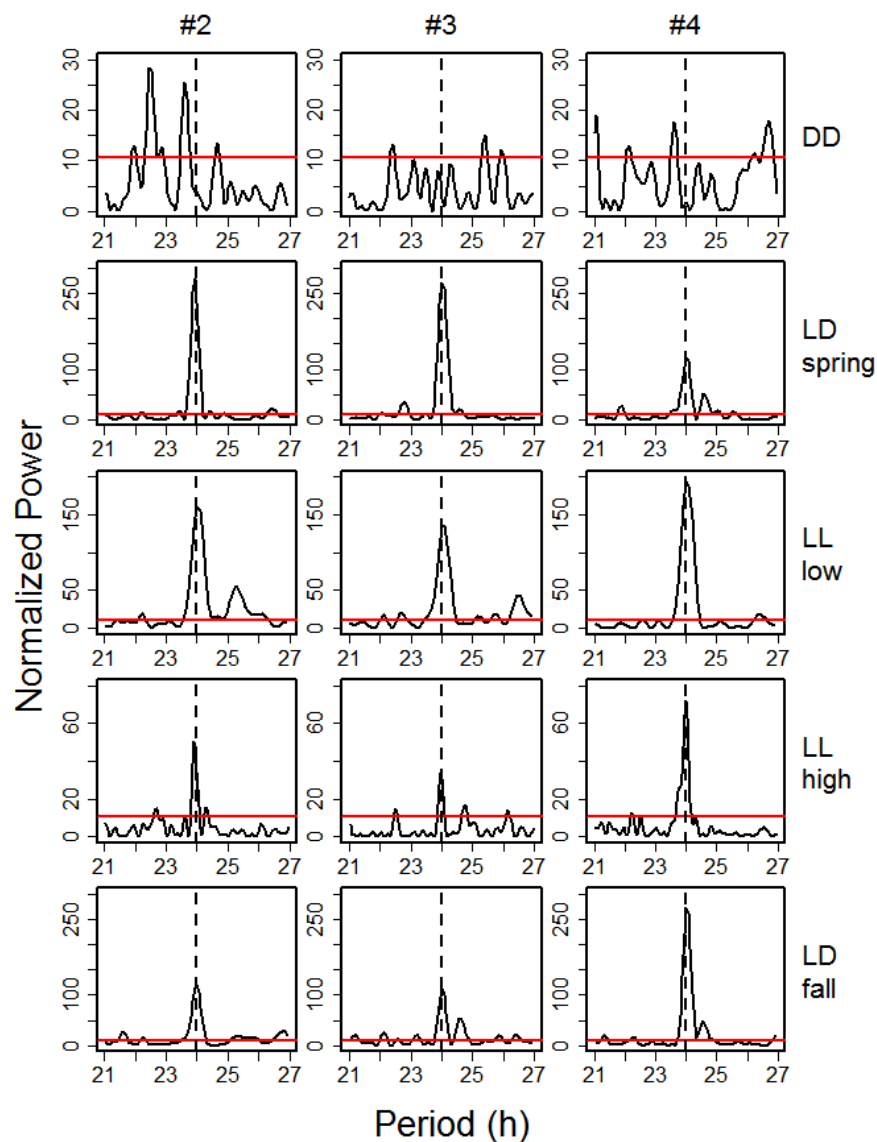

Figure S1 Comparison of rhythms of head position changes with period lengths ( $\tau$ ) between 21 and 27 hours of study animals #2, #3, and #4 between Nov 15, 2012 and Nov 15, 2013. Plotted are normalized powers of rhythms of activity. Each row of panels represents the different time periods: Polar Night (DD), daylight and night (LD), continual light (Midnight Sun, LL) before the onset of new vegetation growth with NDVI values  $<0$  (LL low), and continual light with above-ground new vascular plant growth (NDVI $>0$ , LL high). Horizontal red lines indicate the significance threshold of  $p=0.001$ .

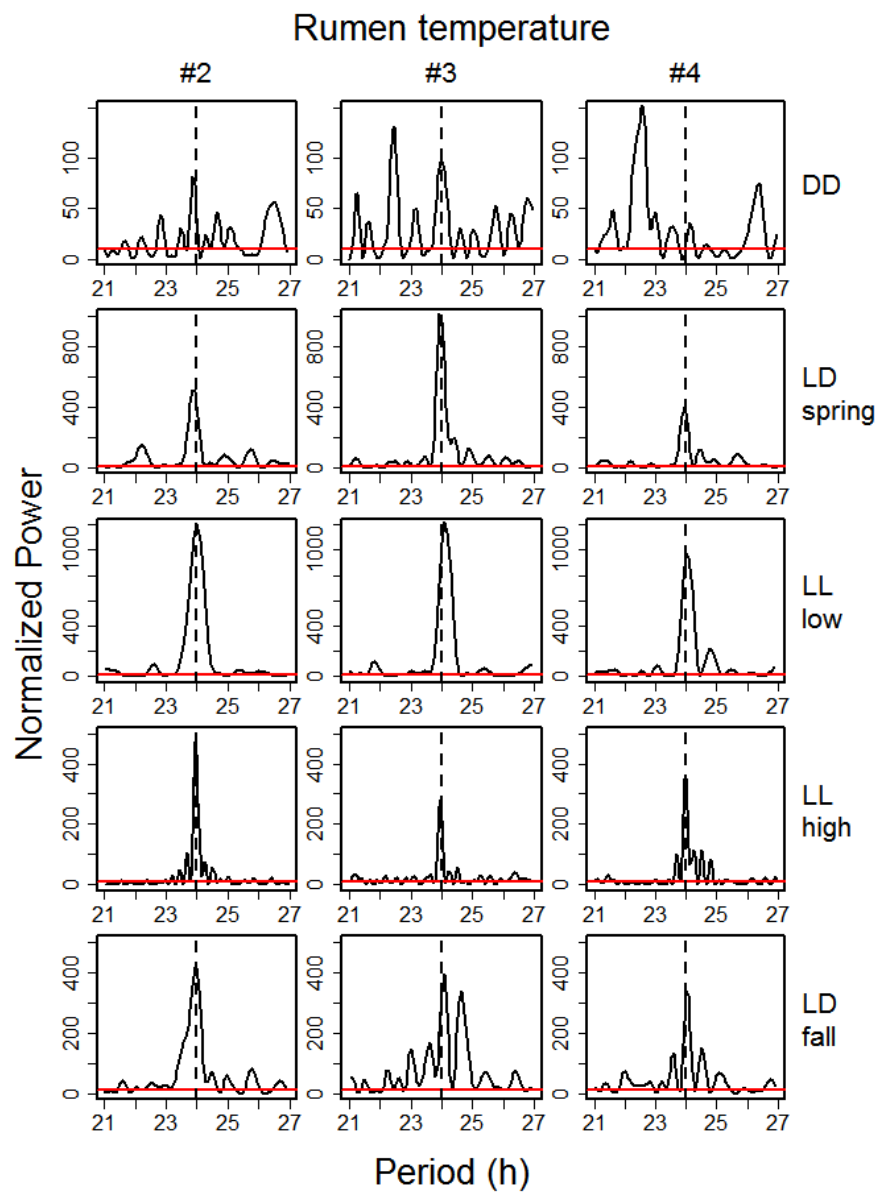

Figure S2 Comparison of rhythms of rumen temperature with period lengths ( $\tau$ ) between 21 and 27 hours of study animals #2, #3, and #4 between Nov 15, 2012 and Nov 15, 2013. Plotted are normalized powers of rhythms of activity. Each row of panels represents the different time periods: Polar Night (DD), daylight and night (LD), continual light (Midnight Sun, LL) before the onset of new vegetation growth with NDVI values  $<0$  (LL low), and continual light with above-ground new vascular plant growth (NDVI $>0$ , LL high). Horizontal red lines indicate the significance threshold of  $p=0.001$ .

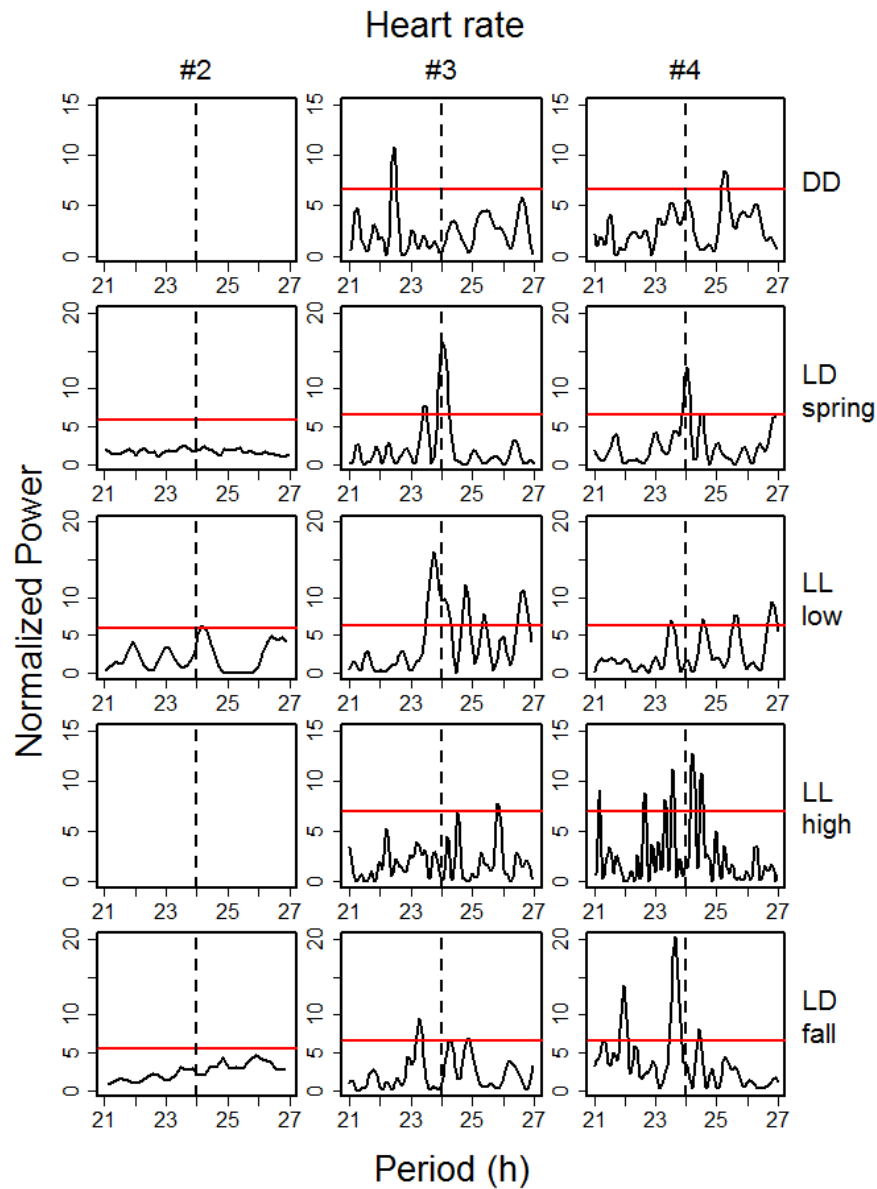

Figure S3 Comparison of rhythms of heart rate with period lengths ( $\tau$ ) between 21 and 27 hours of study animals #2, #3, and #4 between Nov 15, 2012 and Nov 15, 2013. Plotted are normalized powers of rhythms of activity. Each row of panels represents the different time periods: Polar Night (DD), daylight and night (LD), continual light (Midnight Sun, LL) before the onset of new vegetation growth with NDVI values  $<0$  (LL low), and continual light with above-ground new vascular plant growth (NDVI  $>0$ , LL high). Horizontal red lines indicate the significance threshold of  $p=0.05$ .

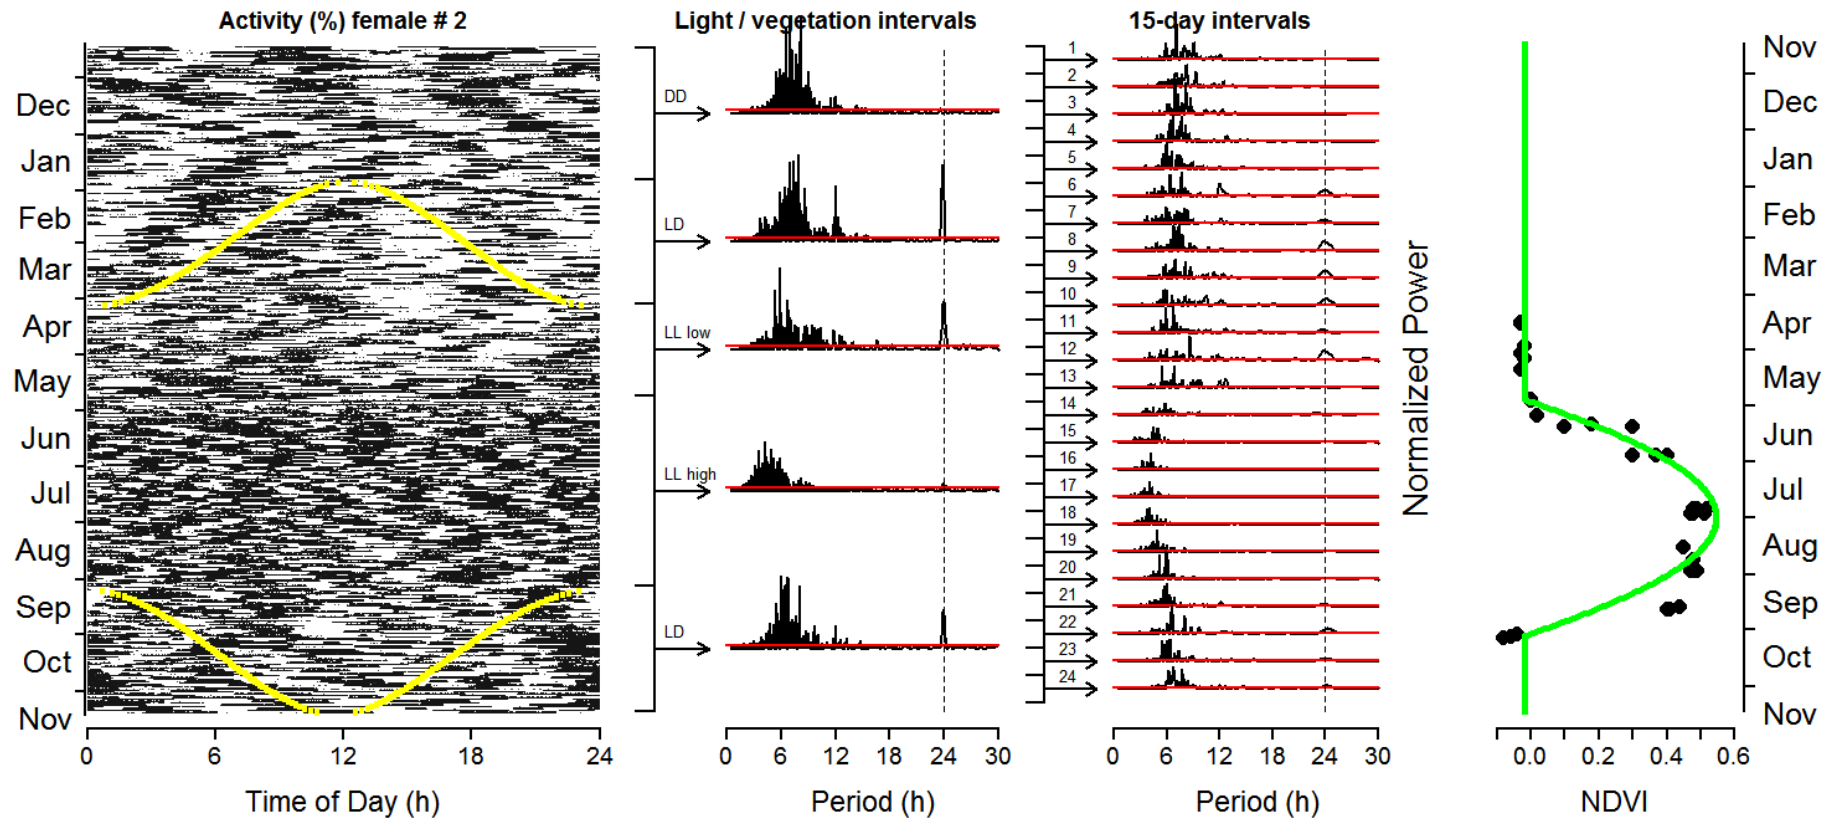

Figure S4 24 hour patterns of activity per 3-minute measurement interval and changes between Nov 15, 2012 and Nov 15, 2013 of individual #2. Panels from left to right: Actogram, yellow lines indicate beginning and end of civil twilight; periodograms for periods with different photic/vegetation conditions; periodograms for 15-day intervals; seasonal course of NDVI values. Horizontal red lines indicate the significance threshold of  $p < 0.001$ . For details see legend to Fig. 5.

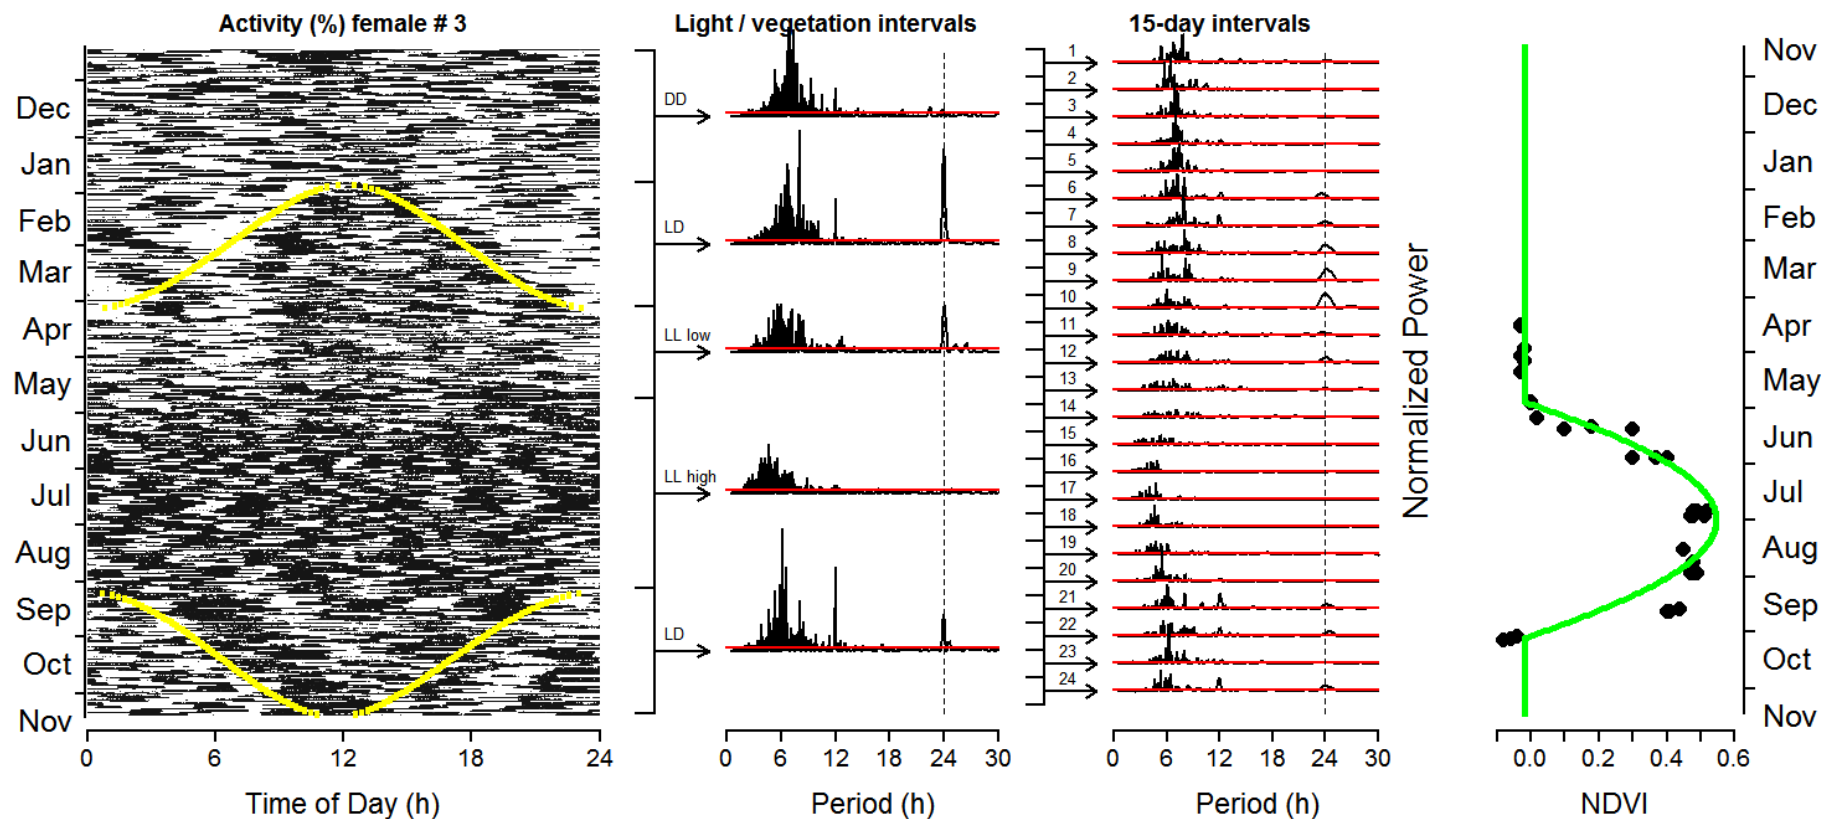

Figure S5 24 hour patterns of activity per 3-minute measurement interval and changes between Nov 15, 2012 and Nov 15, 2013 of individual #3. Panels from left to right: Actogram, yellow lines indicate beginning and end of civil twilight; periodograms for periods with different photic/vegetation conditions; periodograms for 15-day intervals; seasonal course of NDVI values. Horizontal red lines indicate the significance threshold of  $p < 0.001$ . For details see legend to Fig. 5.

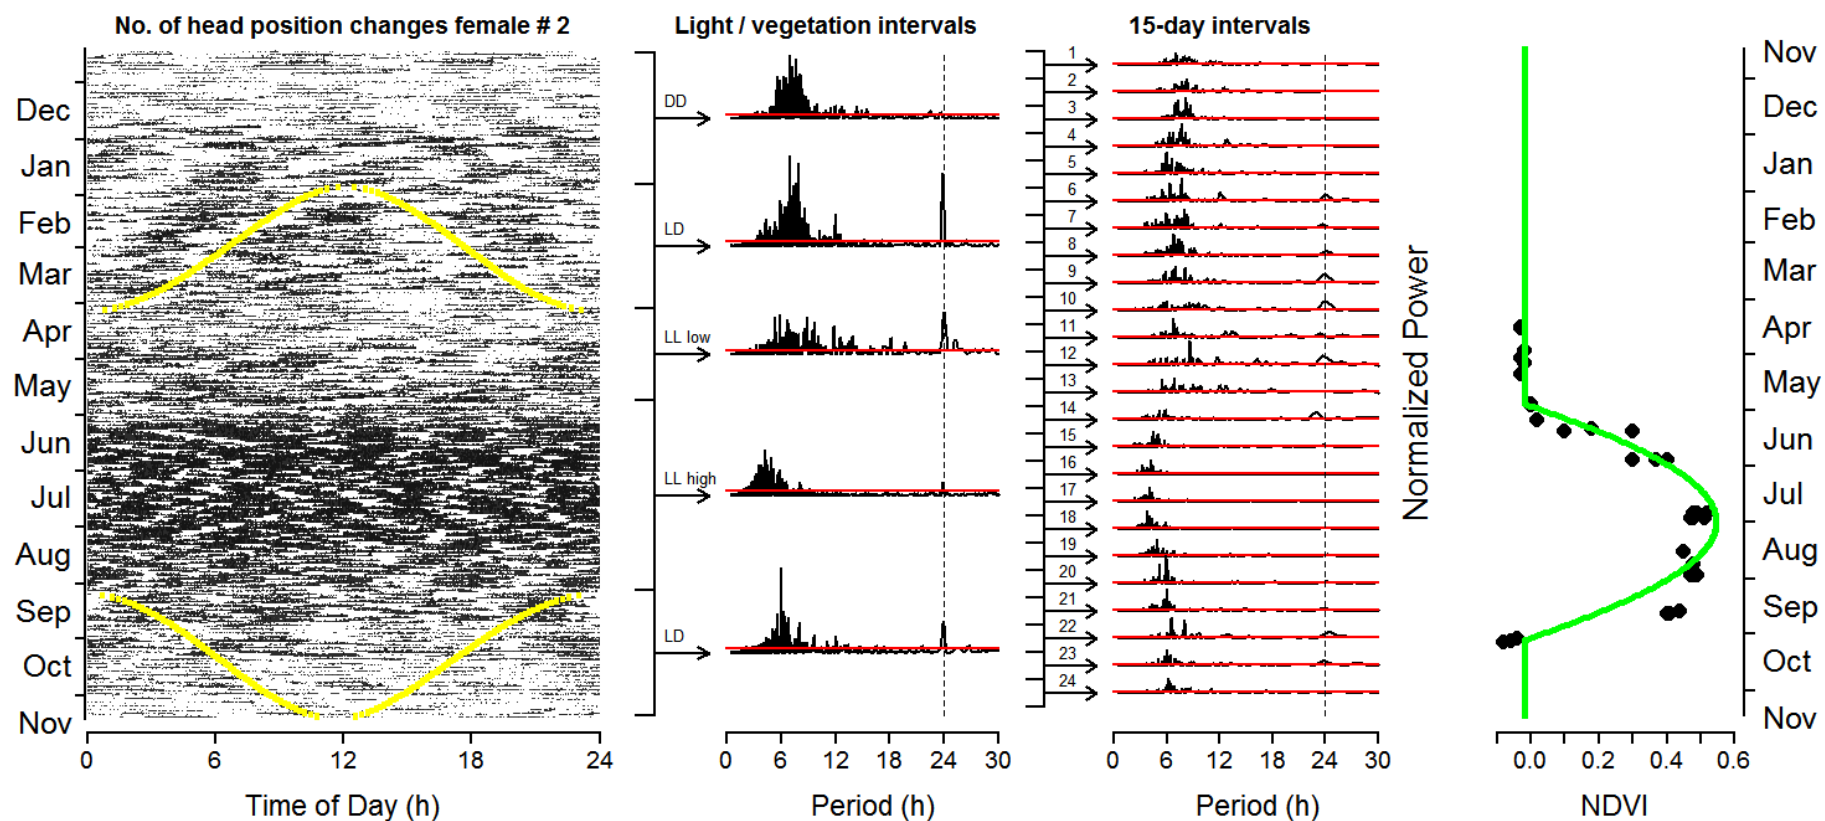

Figure S6 24 hour patterns of the number of head position changes per 3-minute measurement interval and changes between Nov 15, 2012 and Nov 15, 2013 of individual #2. Panels from left to right: Actogram, yellow lines indicate beginning and end of civil twilight; periodograms for periods with different photic/vegetation conditions; periodograms for 15-day intervals; seasonal course of NDVI values. Horizontal red lines indicate the significance threshold of  $p=0.001$ . For details see legend to Fig. 5.



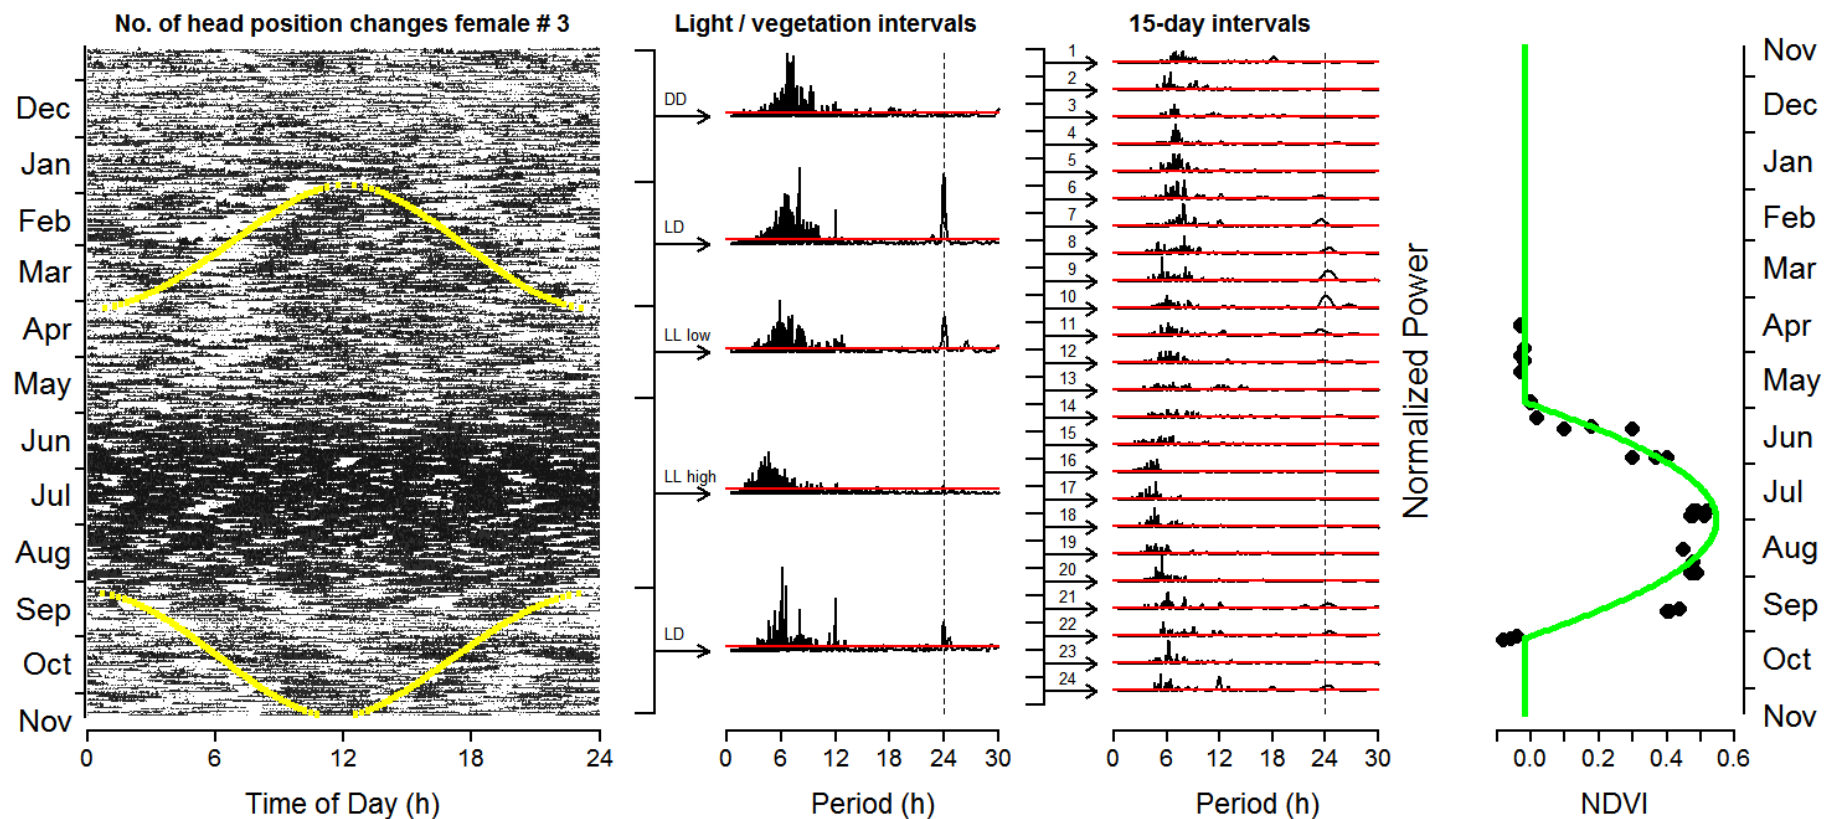

Figure S7 24 hour patterns of the number of head position changes per 3-minute measurement interval and changes between Nov 15, 2012 and Nov 15, 2013 of individual #3. Panels from left to right: Actogram, yellow lines indicate beginning and end of civil twilight; periodograms for periods with different photic/vegetation conditions; periodograms for 15-day intervals; seasonal course of NDVI values. Horizontal red lines indicate the significance threshold of  $p=0.001$ . For details see legend to Fig. 5.



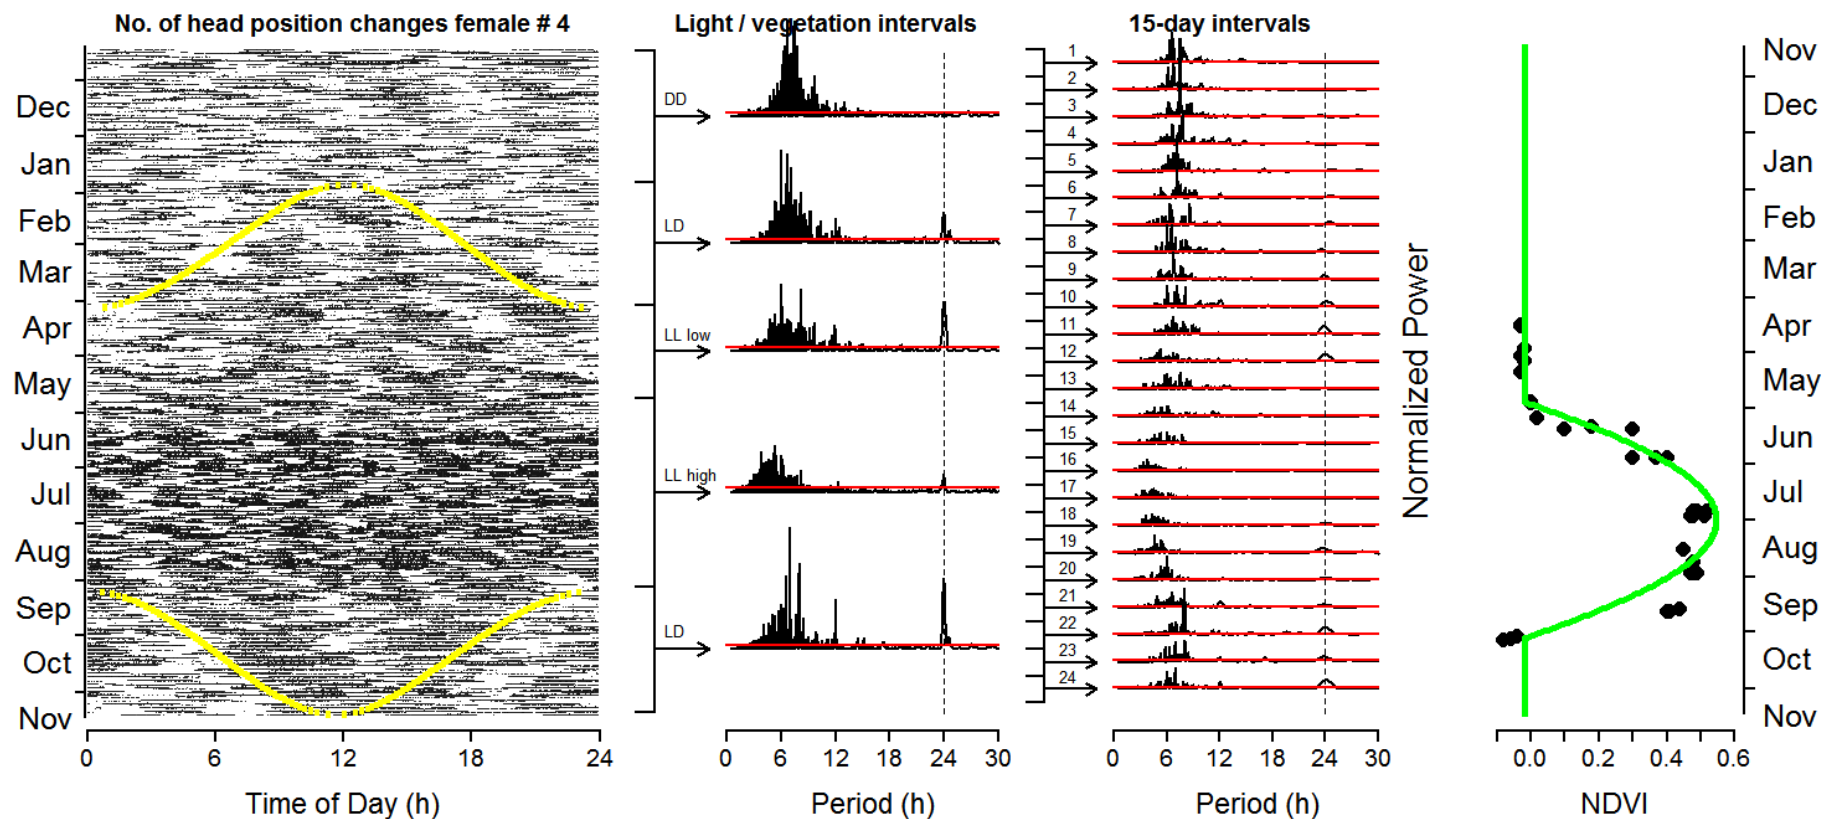

Figure S8 24 hour patterns of the number of head position changes per 3-minute measurement interval and changes between Nov 15, 2012 and Nov 15, 2013 of individual #4. Panels from left to right: Actogram, yellow lines indicate beginning and end of civil twilight; periodograms for periods with different photic/vegetation conditions; periodograms for 15-day intervals; seasonal course of NDVI values. Horizontal red lines indicate the significance threshold of  $p=0.001$ . For details see legend to Fig. 5.

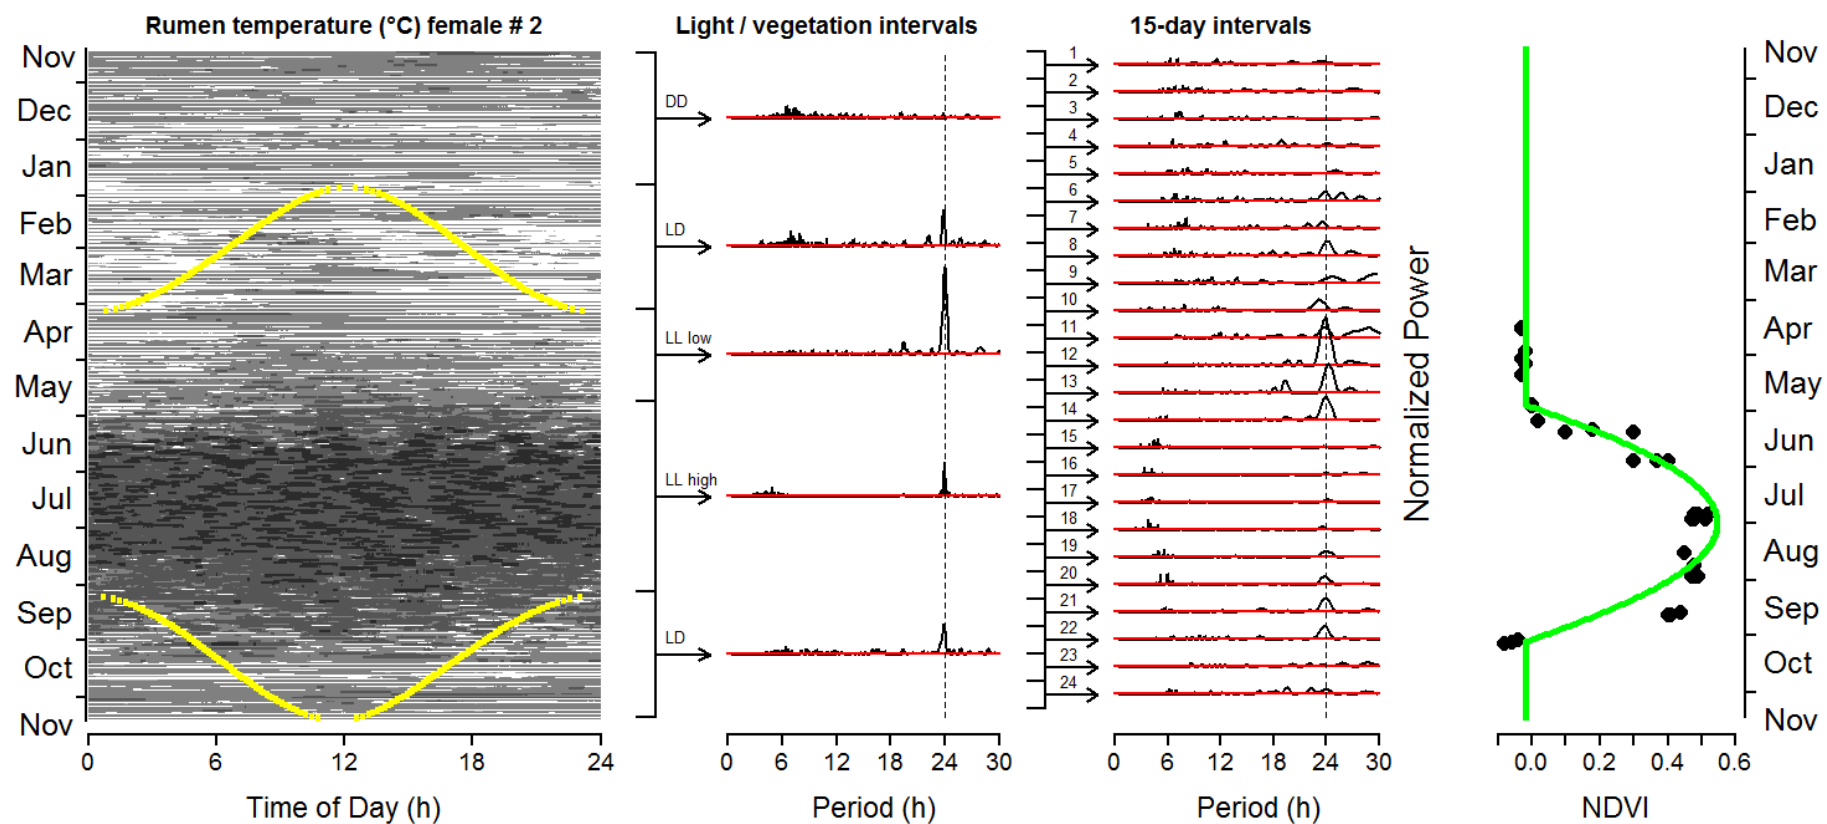

Figure S9 24 hour patterns of temperatures in the rumen,  $T_{\text{rumen}}$ , measured every 3-minutes and changes between Nov 15, 2012 and Nov 15, 2013 of individual #2. Panels from left to right: Actogram-like pattern of daily changes in  $T_{\text{rumen}}$ , with height of bars and their degree of darkness proportional to  $T_{\text{rumen}}$ , yellow lines indicate beginning and end of civil twilight; periodograms for periods with different photic/vegetation conditions; periodograms for 15-day intervals; seasonal course of NDVI values. Horizontal red lines indicate the significance threshold of  $p=0.001$ . For details see legend to Fig. 5.

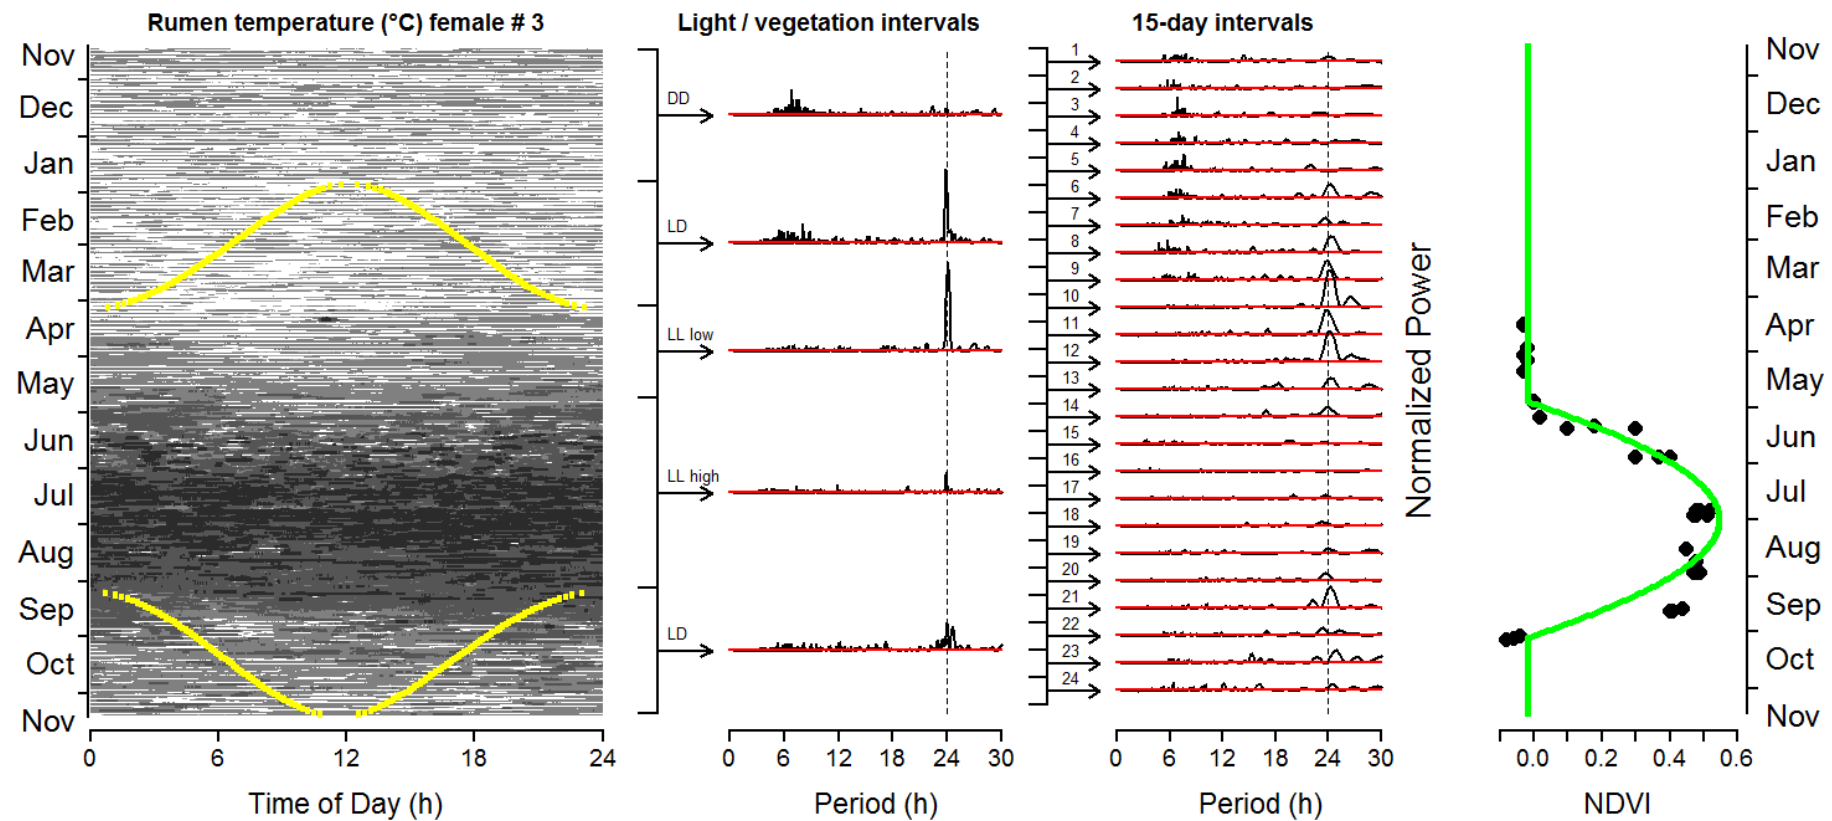

Figure S10 24 hour patterns of temperatures in the rumen,  $T_{\text{rumen}}$ , measured every 3-minutes and changes between Nov 15, 2012 and Nov 15, 2013 of individual #3. Panels from left to right: Actogram-like pattern of daily changes in  $T_{\text{rumen}}$ , with height of bars and their degree of darkness proportional to  $T_{\text{rumen}}$ , yellow lines indicate beginning and end of civil twilight; periodograms for periods with different photic/vegetation conditions; periodograms for 15-day intervals; seasonal course of NDVI values. Horizontal red lines indicate the significance threshold of  $p=0.001$ . For details see legend to Fig. 5.

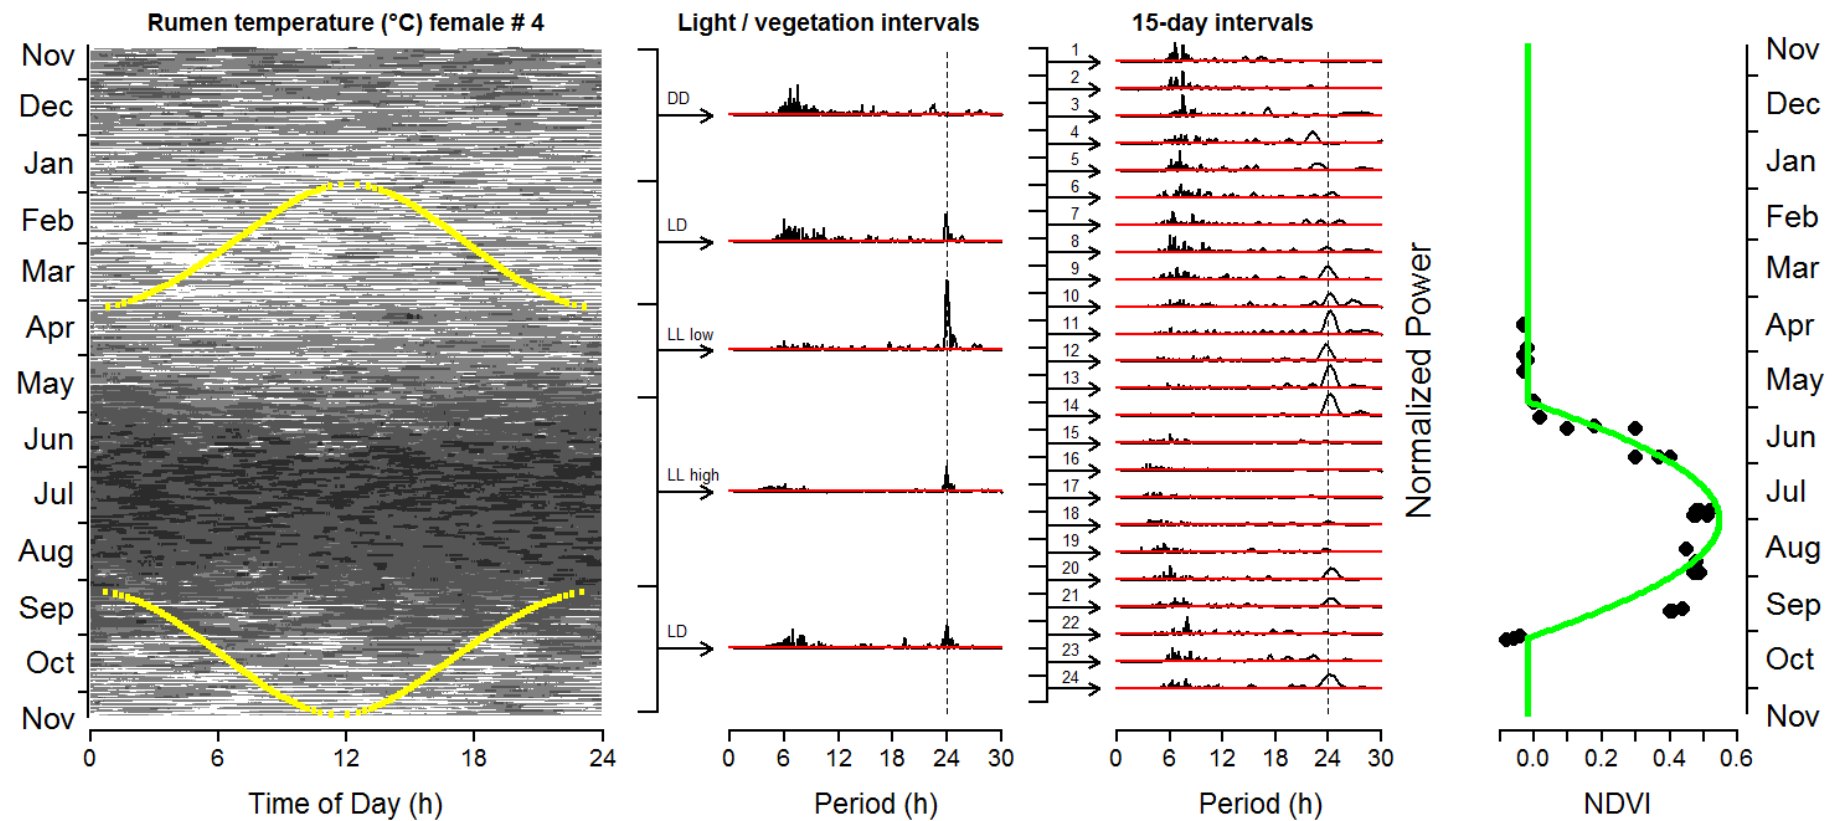

Figure S11 24 hour patterns of temperatures in the rumen,  $T_{\text{rumen}}$ , measured every 3-minutes and changes between Nov 15, 2012 and Nov 15, 2013 of individual #4. Panels from left to right: Actogram-like pattern of daily changes in  $T_{\text{rumen}}$ , with height of bars and their degree of darkness proportional to  $T_{\text{rumen}}$ , yellow lines indicate beginning and end of civil twilight; periodograms for periods with different photic/vegetation conditions; periodograms for 15-day intervals; seasonal course of NDVI values. Horizontal red lines indicate the significance threshold of  $p=0.001$ . For details see legend to Fig. 5.

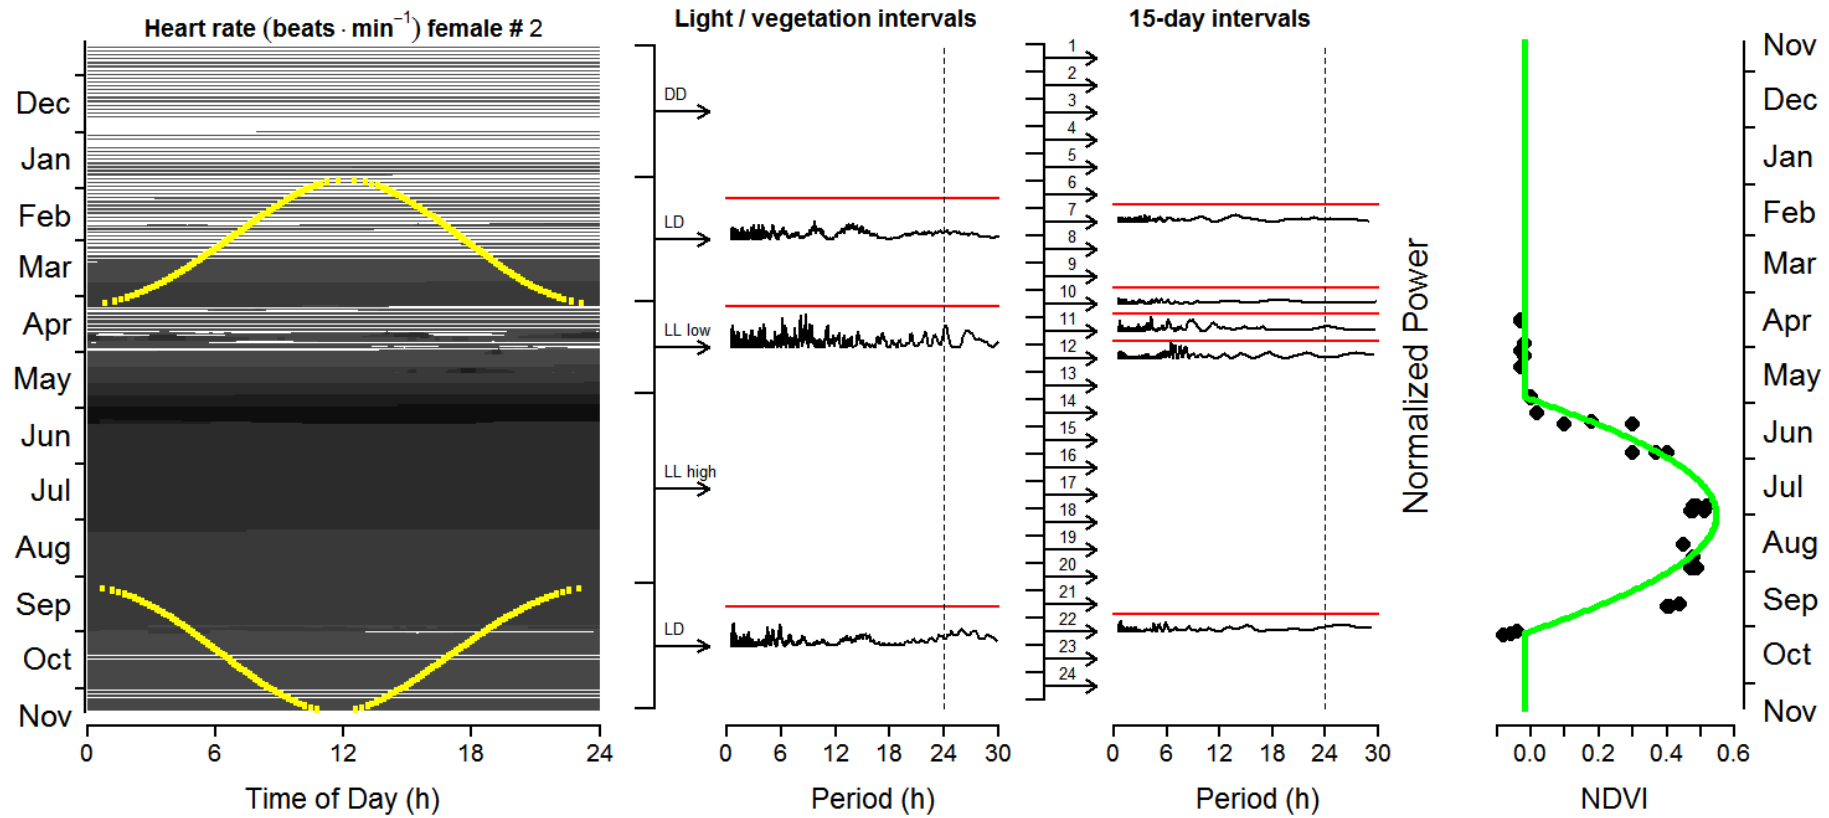

Figure S12 24 hour patterns of stationary heart rate,  $HR_s$ , measured every 21 minutes during a 3-minute interval, and changes between Nov 15, 2012 and Nov 15, 2013 of individual #2. Panels from left to right: Actogram-like pattern of daily changes in  $HR_s$ , with height of bars and their degree of darkness proportional to  $HR_s$ , yellow lines indicate beginning and end of civil twilight; periodograms for periods with different photic/vegetation conditions; periodograms for 15-day intervals, missing lines indicate insufficient sample size for Lomb-Scargle periodogram analysis; seasonal course of NDVI values. Horizontal red lines indicate the significance threshold of  $p=0.05$ . For details see legend to Fig. 5.

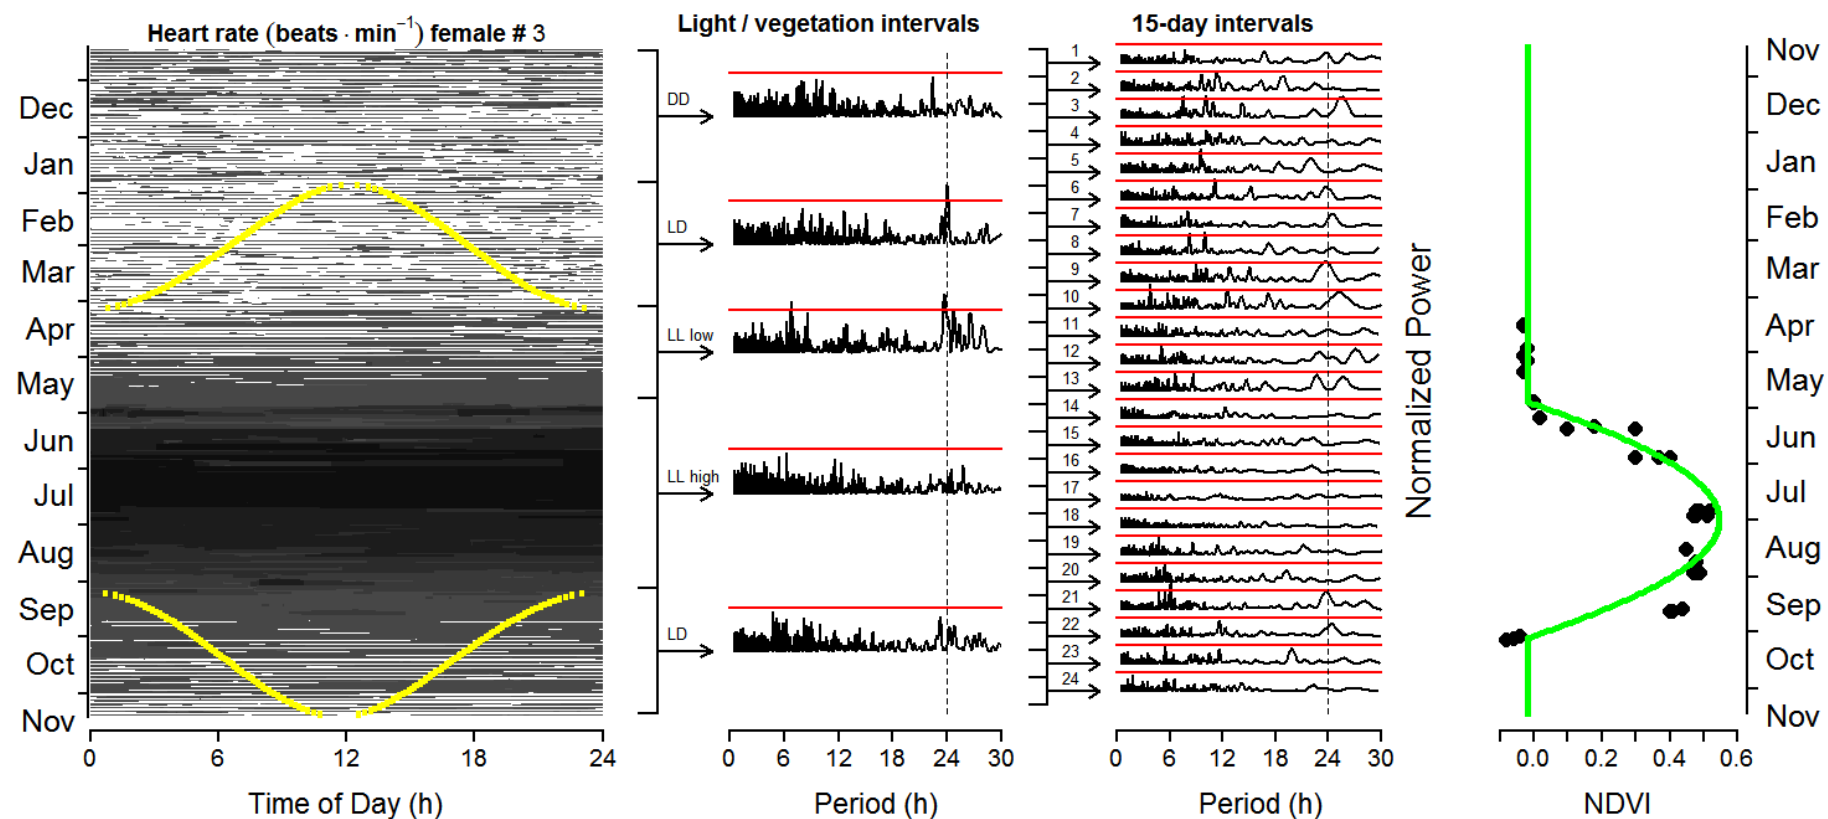

Figure S13 24 hour patterns of stationary heart rate,  $HR_s$ , measured every 21 minutes during a 3-minute interval, and changes between Nov 15, 2012 and Nov 15, 2013 of individual #3. Panels from left to right: Actogram-like pattern of daily changes in  $HR_s$ , with height of bars and their degree of darkness proportional to  $HR_s$ , yellow lines indicate beginning and end of civil twilight; periodograms for periods with different photic/vegetation conditions; periodograms for 15-day intervals, missing lines indicate insufficient sample size for Lomb-Scargle periodogram analysis; seasonal course of NDVI values. Horizontal red lines indicate the significance threshold of  $p=0.05$ . For details see legend to Fig. 5.

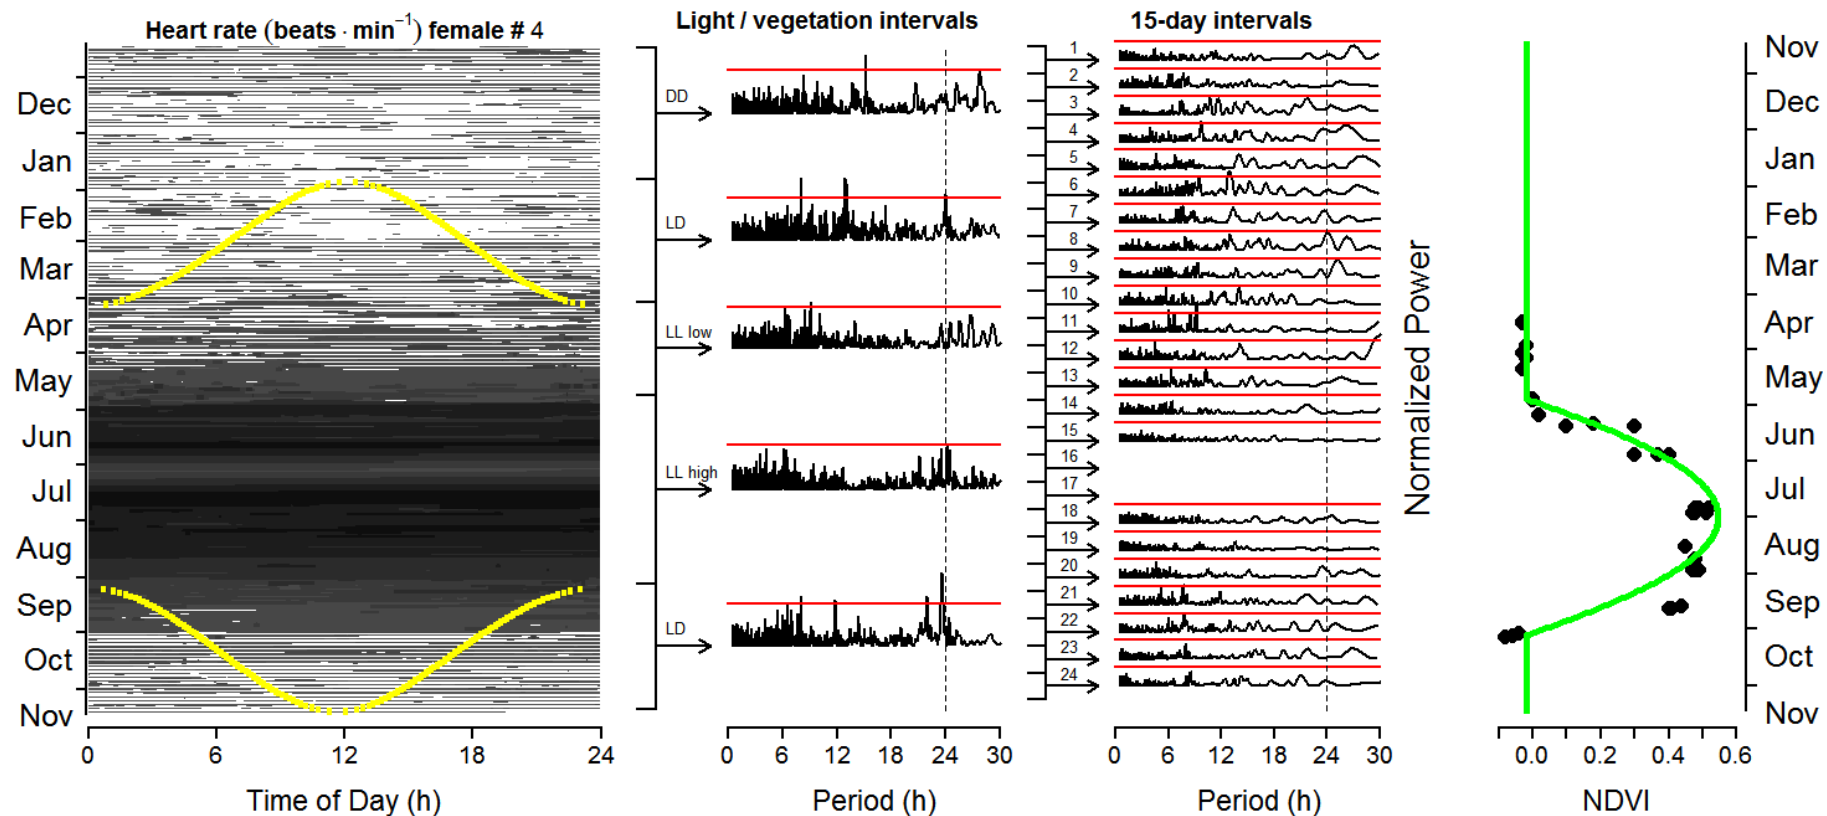

Figure S14 24 hour patterns of stationary heart rate,  $HR_s$ , measured every 21 minutes during a 3-minute interval, and changes between Nov 15, 2012 and Nov 15, 2013 of individual #4. Panels from left to right: Actogram-like pattern of daily changes in  $HR_s$ , with height of bars and their degree of darkness proportional to  $HR_s$ , yellow lines indicate beginning and end of civil twilight; periodograms for periods with different photic/vegetation conditions; periodograms for 15-day intervals, missing lines indicate insufficient sample size for Lomb-Scargle periodogram analysis; seasonal course of NDVI values. Horizontal red lines indicate the significance threshold of  $p=0.05$ . For details see legend to Fig. 5.
